# Supplementary material
Source: PubMed Central journal article supplement (PMC10529904)
Supplement: NIHMS1923026-supplement-1.pdf [file NIHMS1923026-supplement-1.pdf]

1 Supplementary figure and legend

Fig.S1

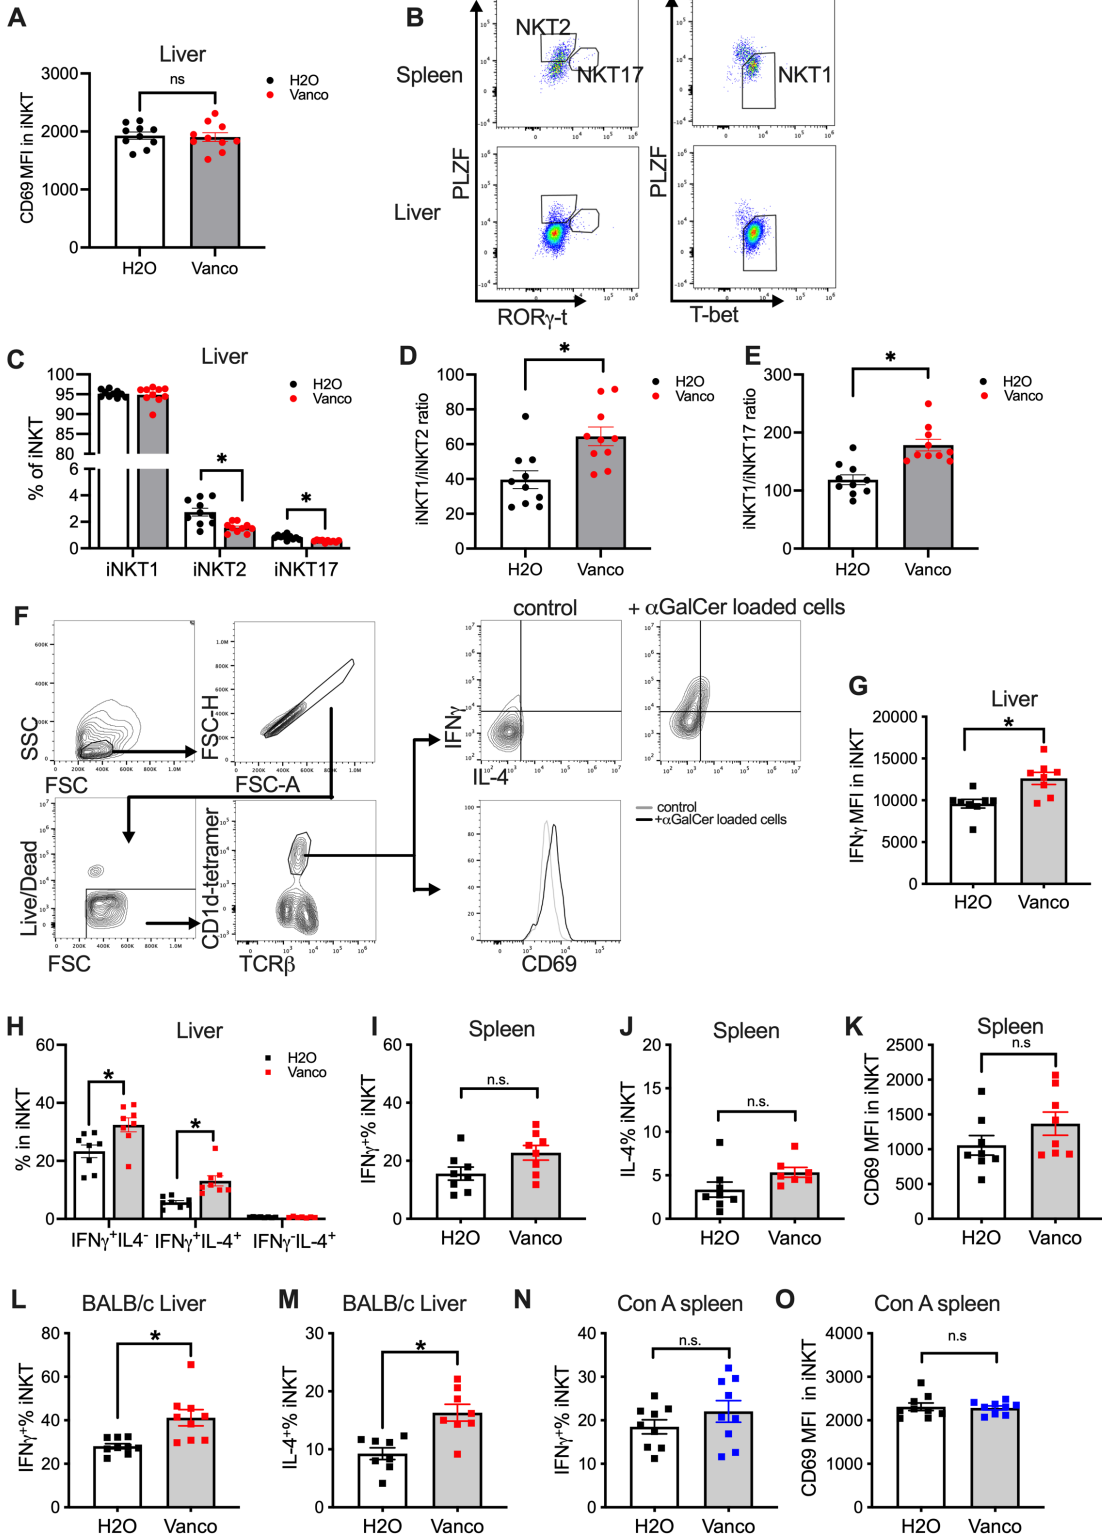

2

3 **Supplementary Figure 1, related to Figure 1.**

4 (A) C57BL/6 mice were kept with vancomycin or H2O for 3 weeks. Liver iNKT CD69 MFI was  
5 measured by flow cytometry. Results are presented as mean+/- SEM from two independent  
6 experiment, n=10, student t-test.

7 (B-E) C57BL/6 mice were kept with vancomycin or H2O for 3 weeks. iNKT subsets were measured  
8 by flow cytometry. (B)Gating strategy for iNKT subsets. Liver iiNKT subset composition (C),  
9 iNKT1/iNKT2 ratio (D) and iNKT1/iNKT17 ratio (E) were measured. Results are presented as  
10 mean+/- SEM from two independent experiment, n=10, p<0.05, two-way ANOVA for (C), student  
11 t-test for (D,E).

12 (F)Gating strategy for cytokine producing iNKT cells.

13 (G-K)  $\alpha$ GalCer-loaded EL4 cells were injected *i.v.* into C57BL/6 mice kept on vancomycin or H2O  
14 for 3 weeks. Liver iNKT cells IFN $\gamma$  MFI (G) and IFN $\gamma$  or IL-4 positive frequencies (H) were measured.  
15 IFN $\gamma$ % (I), IL-4% (J) and CD69 MFI (K) of spleen iNKT cells were determined. Results are presented  
16 as mean+/- SEM of two independent experiments, n=8, student t-test.

17 (L, M) BALB/c mice were kept on vancomycin or H2O for 3 weeks.  $\alpha$ GalCer-loaded A20 cells plus  
18 brefeldin A were injected *i.v.*. Two hours later, liver mononuclear cells were isolated and liver  
19 iNKT cell IFN $\gamma$ % (L) and IL-4% (M) were measured. Results are presented as mean+/- SEM of two  
20 independent experiments, n=8, p<0.05, student t-test.

21 (N, O) 50ug ConA was injected *i.v.* in C57BL/6 mice kept on vancomycin or H2O for 3 weeks.  
22 Spleen iNKT cell IFN $\gamma$ % (N) and CD69 MFI (O) were measured. Results are presented as mean+/-  
23 SEM from two independent experiments, n=9, p<0.05, student t-test.

24

**Fig.S2**

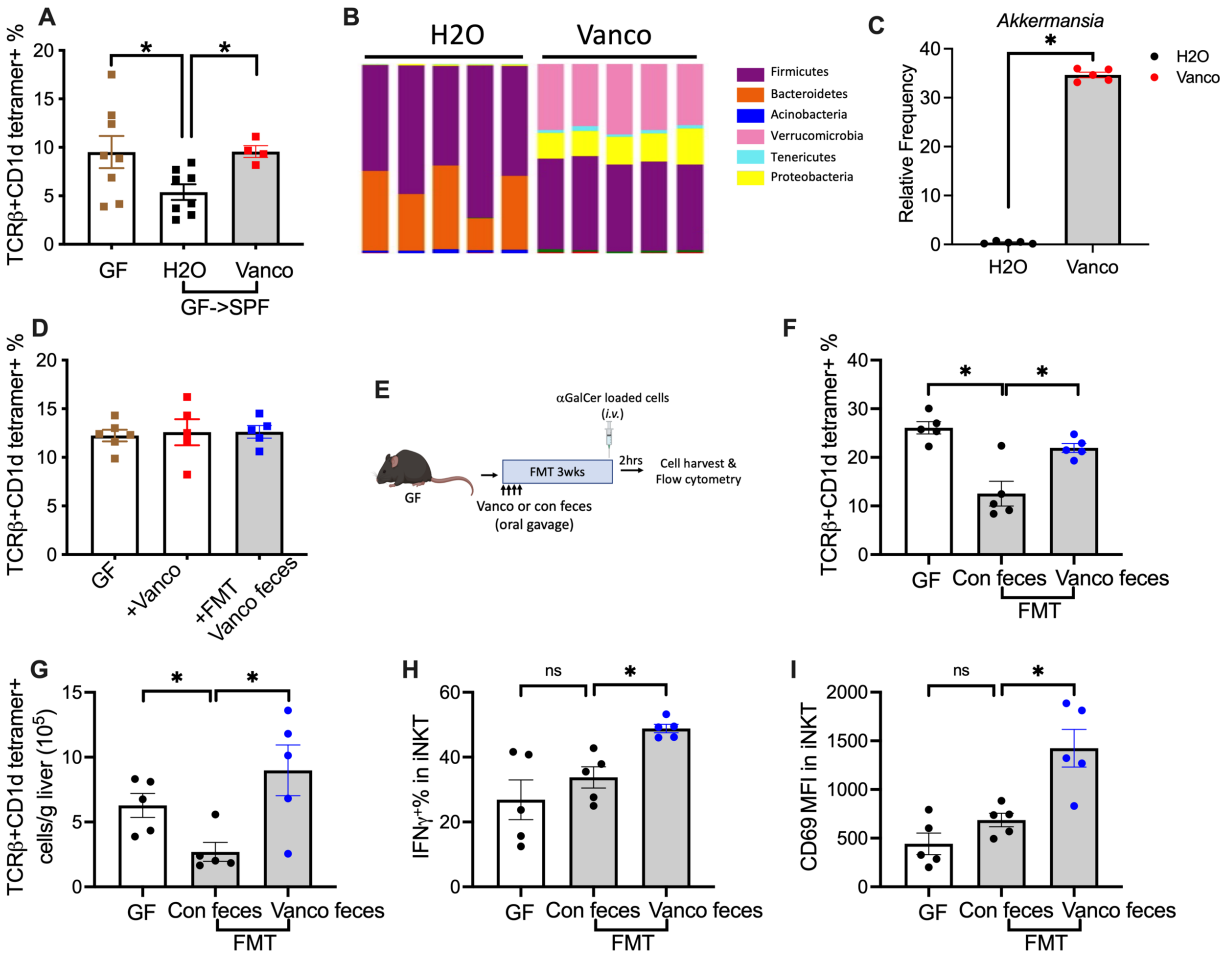

25  
26  
27  
28  
29  
30  
31  
32  
33  
34  
35  
36  
37  
38  
39  
40  
41

**Supplementary Figure 2, related to Figure 2.**

(A) BALB/c germ free mice were transferred to SPF facility to recolonize gut microbiome. Then the conventionalized mice were kept on vancomycin for H2O for 3 weeks. Frequency of liver iNKT cells were measured. Results are presented as mean $\pm$  SEM from two independent experiments, n=8 for GF, 8 for GF->SPF H2O, 4 for GF->SPF Vanco, p<0.05, one-way ANOVA.

(B,C) Feces from C57BL/6 mice kept on vancomycin or H2O were analyzed by 16S rRNA sequencing. Fecal bacterial composition at phylum level (B) and relative abundance of *Akkermansia muciniphila* (C) are shown.

(D) BALB/c germ free mice were kept on vancomycin or FMT with vanco feces. Frequency of liver iNKT cells were measured. Results are presented as mean $\pm$  SEM from one experiment, n=6 for GF, 5 for vanco, 5 for vanco feces, one-way ANOVA.

(E-I) C57BL/6 germ free mice received FMT of control or vanco feces. Three weeks later mice were given *i.v.* injection of  $\alpha$ GalCer-loaded EL4 cells with brefeldin A. Two hours later mice were euthanized, and liver mononuclear cells were isolated for flow cytometry analysis. Liver iNKT absolute numbers (F), frequencies(G), IFN $\gamma$ % (H) and CD69MFI (I) were measured. Results are presented as mean $\pm$  SEM from one experiment, n=5, p<0.05, one-way ANOVA.

**Fig.S3**

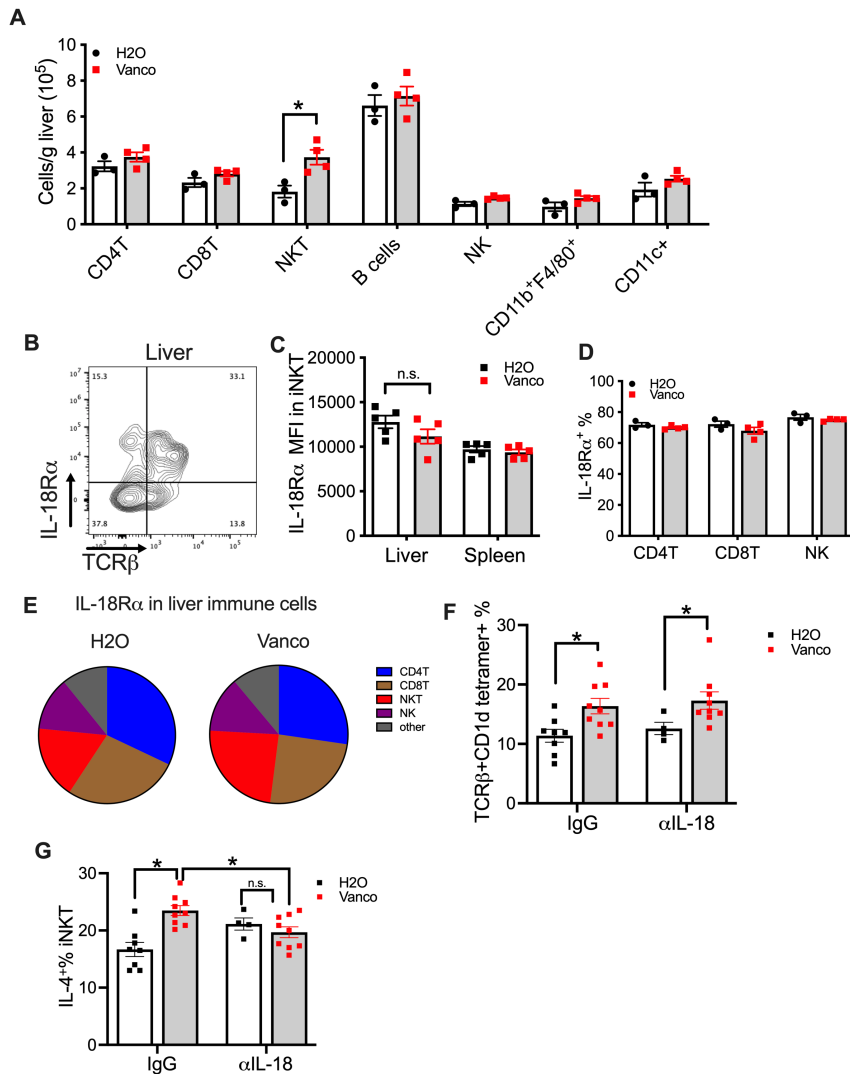

42

43 **Supplementary Figure 3, related to Figure 3.**

44 (A) Frequency of different immune cells in the liver of mice kept on vancomycin or H2O. Results  
45 are presented as mean $\pm$  SEM from one experiment, n=4, p<0.05, two-way ANOVA.

46 (B) Representative plot of IL-18Ra staining of liver iNKT cells.

47 (C,D) Mice were kept on vancomycin or H2O for three weeks. IL-18Ra MFI of iNKT cells (C) and  
48 IL-18Ra positive frequencies of liver CD4<sup>+</sup> T, CD8<sup>+</sup> T and NK cells (D) were measured. Results are  
49 presented as mean $\pm$  SEM of one experiment, n=4.

50 (E) The composition of liver IL-18Ra<sup>+</sup> immune cells from mice treated with vancomycin or H2O.

51 (F, G) Vancomycin or H2O treated BALB/c mice were given two *i.p.* injections of  $\alpha$ IL-18. Then mice  
52 were injected with  $\alpha$ GalCer-loaded A20 cells. Frequencies of liver iNKT (F) and IL-4<sup>+</sup> iNKT cells (G)  
53 were measured. Results are presented as mean $\pm$  SEM from two independent experiments. n=8  
54 for IgG H2O, 9 for IgG vanco, 4 for  $\alpha$ IL-18 H2O, 9 for  $\alpha$ IL-18 vanco, p<0.05, two-way ANOVA.

55

**Fig.S4**

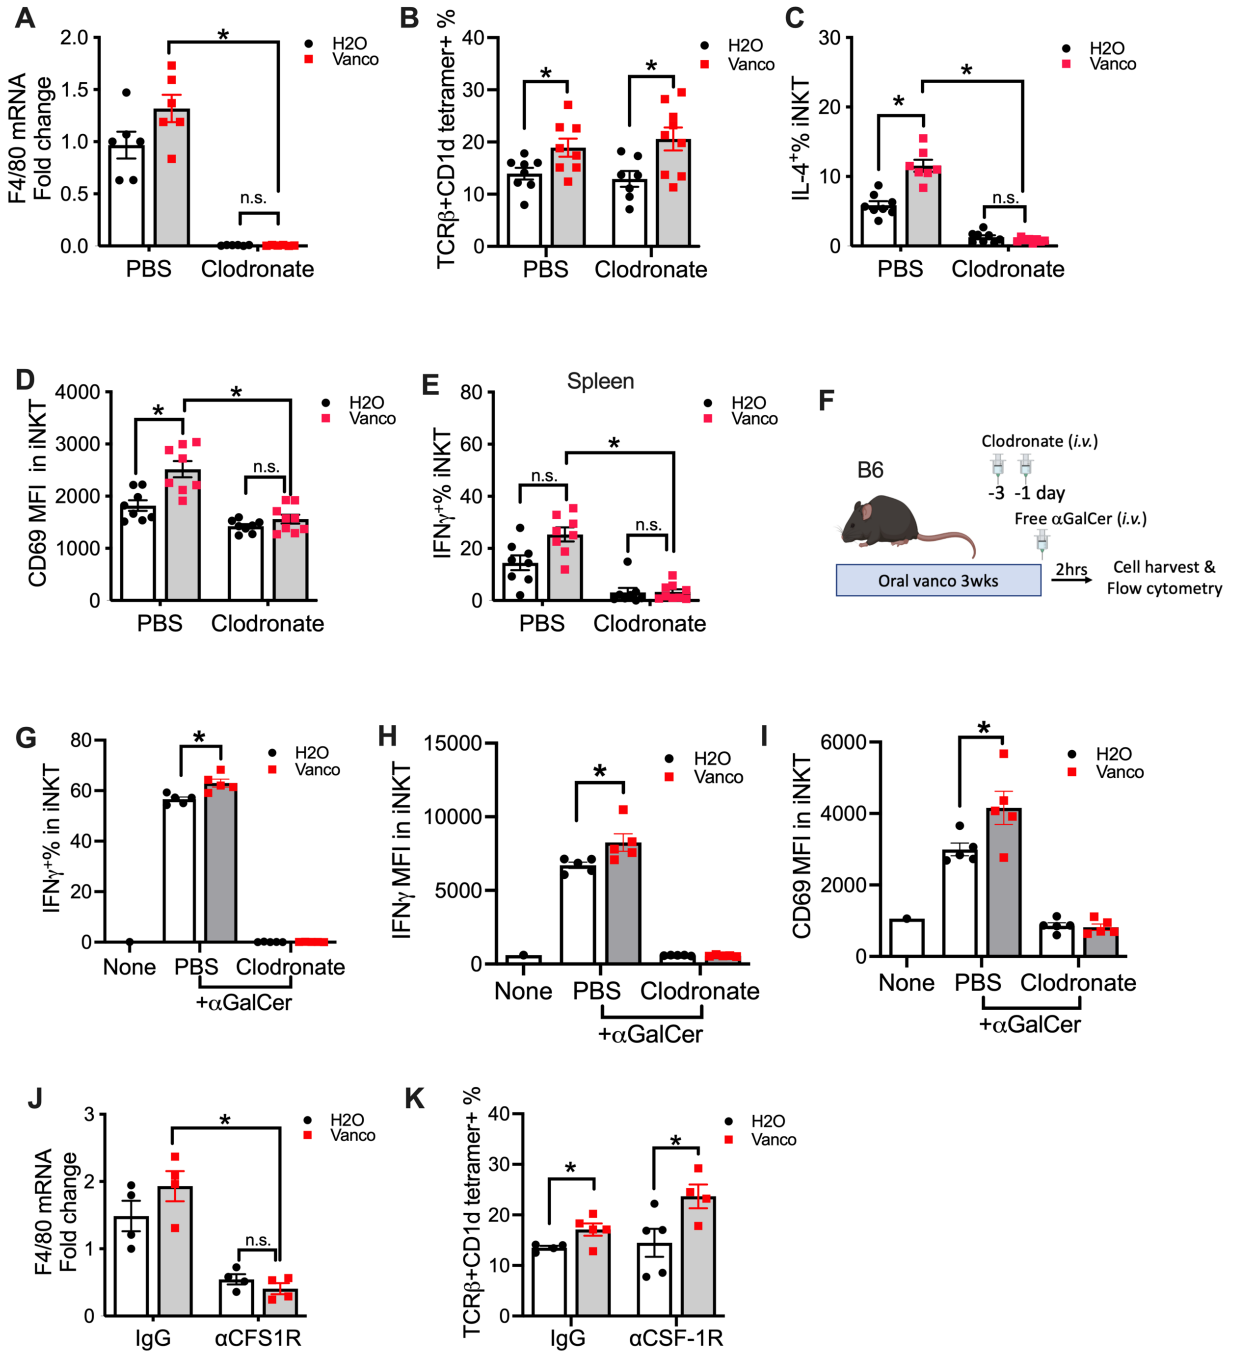

56

57

58 **Supplementary Figure 4, related to Figure 4.**

59 **(A-E)** Vancomycin or H<sub>2</sub>O treated C57BL/6 mice were given two doses of clodronate injections to  
60 deplete macrophages. Then mice were *i.v.* injected with  $\alpha$ GalCer-loaded EL4 cells with brefeldin  
61 A. Two hours later mice were euthanized for analysis. **(A)** Liver F4/80 mRNA was measured by  
62 RT-PCR. **(B)** Frequency of iNKT cells in the liver; **(C)** IL-4<sup>+</sup> iNKT cells in the liver; **(D)** CD69MFI on  
63 iNKT cells in the liver; **(E)** frequencies of IFN $\gamma$ <sup>+</sup> iNKT cells in spleen were measured by flow  
64 cytometry. Results are presented as mean $\pm$  SEM of two independent experiments.  $p < 0.05$ , two-  
65 way ANOVA.

66 **(F-I)** Vancomycin or H<sub>2</sub>O treated C57BL/6 mice were given two doses of clodronate injections to  
67 deplete macrophages. Then mice were *i.v.* injected with free  $\alpha$ GalCer (0.5 $\mu$ g/mouse) with  
68 brefeldin A. Two hours later mice were euthanized for analysis. Liver iNKT cells IFN $\gamma$ <sup>+</sup> **(G)**,  
69 IFN $\gamma$  MFI **(H)** and CD69MFI **(I)** were measured by flow cytometry. Results are presented as  
70 mean $\pm$  SEM of one experiment.  $n = 5$ ,  $p < 0.05$ , two-way ANOVA.

71 **(J,K)** Vancomycin or H<sub>2</sub>O treated BALB/c mice were given two doses of  $\alpha$ CSF-1R injections. Then  
72 mice were *i.v.* injected with  $\alpha$ GalCer-loaded A20 cells. Two hours later mice were euthanized for  
73 analysis. **(J)** Liver F4/80 mRNA was measured by RT-PCR. **(K)** Frequency of iNKT cells in the liver  
74 were measured by flow cytometry. Results are presented as mean $\pm$  SEM from one experiment,  
75  $n = 4$  for IgG H<sub>2</sub>O and IgG Vanco,  $n = 5$  for  $\alpha$ CSF-1R H<sub>2</sub>O and  $\alpha$ CSF-1R Vanco,  $p < 0.05$ , two-way  
76 ANOVA  
77

**Fig.S5**

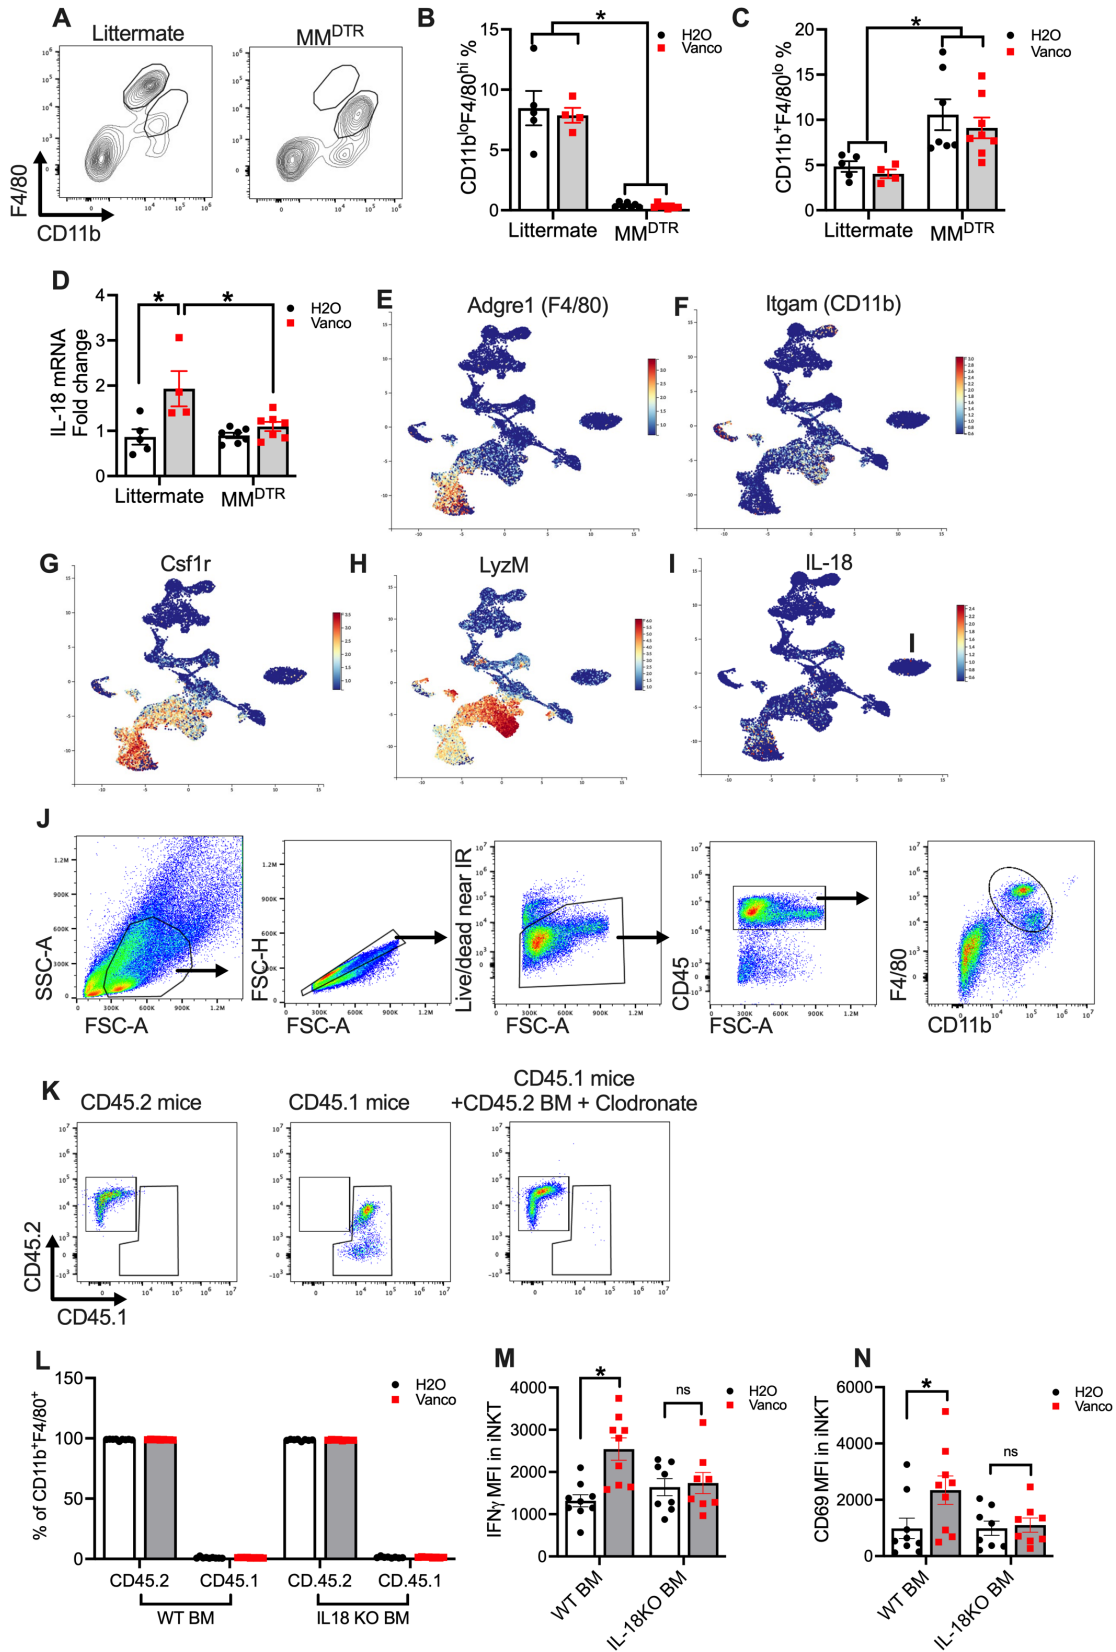

79 **Supplementary Figure 5, related to Figure 4.**

80 **(A-D)** MM<sup>DTR</sup> mice or littermates were kept on vancomycin or H<sub>2</sub>O for 3 weeks. Then the mice  
81 were s.c. injected with DT 200ng/mouse. One day later, mice received *in vivo* stimulation with  
82  $\alpha$ GalCer-loaded EL4 cells. The mice were euthanized two hours later for analysis. **(A)**  
83 Representative plots of liver immune cells after DT-treatment are shown. Frequencies of  
84 CD11b<sup>lo</sup>F4/80<sup>hi</sup> **(B)** and CD11b<sup>+</sup>F4/80<sup>lo</sup> macrophages**(C)** in the liver were determined by flow  
85 cytometry. **(D)** Liver tissue IL-18 mRNA expression was measured by RT-PCR. Results are  
86 presented as mean $\pm$  SEM from two independent experiments, n=5 for littermate H<sub>2</sub>O, 4 for  
87 littermate Vanco, 7 for MM<sup>DTR</sup> H<sub>2</sub>O, 8 for MM<sup>DTR</sup> Vanco, p<0.05, two-way ANOVA.

88 **(E-I)** Gene expression in CD45<sup>+</sup> mouse liver immune cells were visualized using reported scRNA-  
89 Seq dataset at [www.livercellatlas.org](http://www.livercellatlas.org). The expression of Agre1(F4/80) **(E)**, Itgam(CD11b) **(F)**,  
90 Csf1r**(G)**, LyzM **(H)**, and IL-18 **(I)** are shown.

91 **(J-N)** Liver macrophage reconstitution with IL-18 KO or WT macrophages using bone marrow  
92 transplantation combined with clodronate treatment. **(J)** Gating strategy for liver CD11b<sup>+</sup>F4/80<sup>+</sup>  
93 cells. **(K)** Representative plots of CD45.1/45.2 staining of liver CD11b<sup>+</sup>F4/80<sup>+</sup> cells from CD45.2  
94 mice, CD45.1 mice or CD45.1 mice received transplantation of CD45.2 bone marrow plus  
95 clodronate treatment. **(L)** Confirmation of liver macrophage reconstitution by donor CD45.2 WT  
96 or IL-18 KO bone marrow derived macrophages. After *in vivo* stimulation, liver iNKT cells IFN $\gamma$  MFI  
97 **(M)** and CD69 MFI **(N)** were measured by flow cytometry. Results are presented as mean $\pm$  SEM  
98 from two independent experiments, n=10, p<0.05, two-way ANOVA.
